# Supplementary material
Source: PubMed Central journal article supplement (PMC9420782)
Supplement: NIHMS1811919-supplement-supinfo1.pdf [file NIHMS1811919-supplement-supinfo1.pdf]

## **The oral microbiome and breast cancer and non-malignant breast disease, and its relationship with the fecal microbiome in the Ghana Breast Health Study**

Zeni Wu<sup>1</sup>, Doratha A. Byrd<sup>1,2</sup>, Yunhu Wan<sup>1</sup>, Daniel Ansong<sup>3</sup>, Joe-Nat Clegg-Lamptey<sup>4</sup>, Beatrice Wiafe-Addai<sup>5</sup>, Lawrence Edusei<sup>4</sup>, Ernest Adjei<sup>3</sup>, Nicholas Titiloye<sup>3</sup>, Florence Dedey<sup>4</sup>, Francis Aitpillah<sup>3</sup>, Joseph Oppong<sup>3</sup>, Verna Vanderpuye<sup>4</sup>, Ernest Osei-Bonsu<sup>3</sup>, Casey L. Dagnall<sup>1,6</sup>, Kristine Jones<sup>1,6</sup>, Amy Hutchinson<sup>1,6</sup>, Belynda D. Hicks<sup>1,6</sup>, Thomas U. Ahearn<sup>1</sup>, Jianxin Shi<sup>1</sup>, Rob Knight<sup>7</sup>, Richard Biritwum<sup>8</sup>, Joel Yarney<sup>4</sup>, Seth Wiafe<sup>9</sup>, Baffour Awuah<sup>3</sup>, Kofi Nyarko<sup>8</sup>, Jonine D. Figueroa<sup>1,10</sup>, Rashmi Sinha<sup>1</sup>, Montserrat Garcia-Closas<sup>1</sup>, Louise A. Brinton<sup>1</sup>, Emily Vogtmann<sup>1</sup>

### **Table of Contents**

**Table S1** Associations of genus presence/absence with breast cancer and non-malignant breast disease in the Ghana Breast Health Study (provided as separate excel files)

**Table S2** Associations of genus relative abundance with breast cancer and non-malignant breast disease in the Ghana Breast Health Study (provided as separate excel files)

**Table S3** Sensitivity analyses of association between alpha-diversity with breast cancer in participants did not use antibiotics within the last 30 days

**Table S4** Sensitivity analyses of association between beta-diversity with breast cancer in participants did not use antibiotics within the last 30 days

**Figure S1** Rarefaction curve for Observed Amplicon Sequence Variants (ASVs) in oral samples.

**Figure S2** Principal coordinate analysis (PCoA) of the first five principal components of artificial community, rodogut, and oral samples, based on Bray Curtis, Jaccard, and Unweighted UniFrac and Weighted UniFrac distances.

**Figure S3** Principal coordinate analysis (PCoA) of the first five principal components of breast cancer (red), non-malignant breast disease, and controls, based on Bray Curtis, Jaccard, and Unweighted UniFrac and Weighted UniFrac distances.

**Figure S4** Genus-level presence correlations between the oral and fecal microbiome within breast cancer cases, non-malignant cases, and controls.

**Table S3** Sensitivity analyses of association between alpha-diversity with breast cancer in participants did not use antibiotics within the last 30 days

|                               | N   | Case | OR (95% CI)      | P-value  |
|-------------------------------|-----|------|------------------|----------|
| <b>Alpha diversity</b>        |     |      |                  |          |
| Observed ASVs                 |     |      |                  |          |
| Continuous (10 ASVs per unit) | 572 | 327  | 0.87 (0.84-0.91) | 1.40E-10 |
| Q1                            | 217 | 82   | Reference        |          |
| Q2                            | 123 | 79   | 0.38 (0.23-0.64) | 0.0002   |
| Q3                            | 115 | 79   | 0.37 (0.21-0.62) | 0.0002   |
| Q4                            | 117 | 87   | 0.26 (0.15-0.44) | 1.18E-06 |
| Faith's PD                    |     |      |                  |          |
| Continuous                    | 572 | 327  | 0.76 (0.69-0.82) | 5.78E-11 |
| Q1                            | 222 | 82   | Reference        |          |
| Q2                            | 118 | 79   | 0.37 (0.22-0.61) | 0.0001   |
| Q3                            | 114 | 79   | 0.40 (0.23-0.68) | 0.0007   |
| Q4                            | 118 | 87   | 0.27 (0.16-0.47) | 3.02E-06 |
| Shannon index                 |     |      |                  |          |
| Continuous                    | 572 | 327  | 0.57 (0.44-0.74) | 2.74E-05 |
| Q1                            | 196 | 82   | Reference        |          |
| Q2                            | 135 | 79   | 0.63 (0.38-1.04) | 0.0696   |
| Q3                            | 110 | 79   | 0.39 (0.22-0.69) | 0.0012   |
| Q4                            | 131 | 87   | 0.54 (0.32-0.90) | 0.0181   |

Adjusted for age (continuous), study center (Komfo Anoyke Teaching Hospital, Korle Bu Teaching Hospital, or Peace and Love Hospital), body mass index (BMI, categorical), education (junior secondary school or lower, senior secondary school/some college or technical school or more, other or unknown), family history of cancer (yes, no, unknown), number of full-term pregnancies (0, 1-2, 3-4, 5+ pregnancies), alcohol drinking (yes, no, unknown), and current hormonal contraceptive use (yes, no).

Abbreviations: ASVs, amplicon sequence variants; CI, confidence interval; OR, odds ratio; PD, Phylogenetic Diversity

**Table S4** Sensitivity analyses of association between beta-diversity with breast cancer in participants did not use antibiotics within the last 30 days

---

|                    | Breast cancer cases vs. controls |
|--------------------|----------------------------------|
| Bray-Curtis        | <0.0001                          |
| Jaccard            | <0.0001                          |
| Unweighted UniFrac | <0.0001                          |
| Weighted UniFrac   | 0.0002                           |

---

Adjusted for age (continuous), study center (Komfo Anoyke Teaching Hospital, Korle Bu Teaching Hospital, or Peace and Love Hospital), body mass index (BMI, categorical), education (junior secondary school or lower, senior secondary school/some college or technical school or more, other or unknown), family history of cancer (yes, no, unknown), number of full-term pregnancies (0, 1-2, 3-4, 5+ pregnancies), alcohol drinking (yes, no, unknown), and current hormonal contraceptive use (yes, no).

Bonferroni adjusted p-value significance threshold for beta-diversity comparisons was  $p < 0.05/4 = 0.0125$

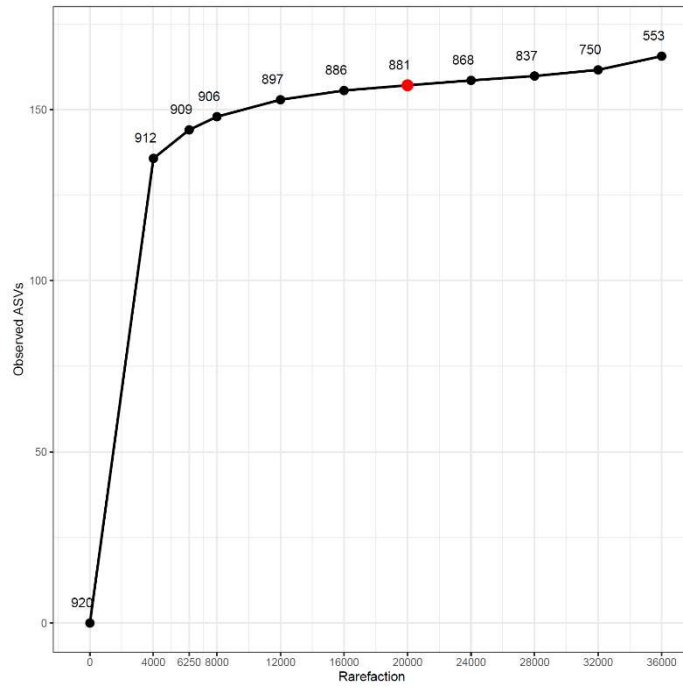

**Figure S1** Rarefaction curve for Observed Amplicon Sequence Variants (ASVs) in oral samples. The red dot is the selected rarefaction level. Each number indicates the number of samples at that specific rarefaction cutpoint.

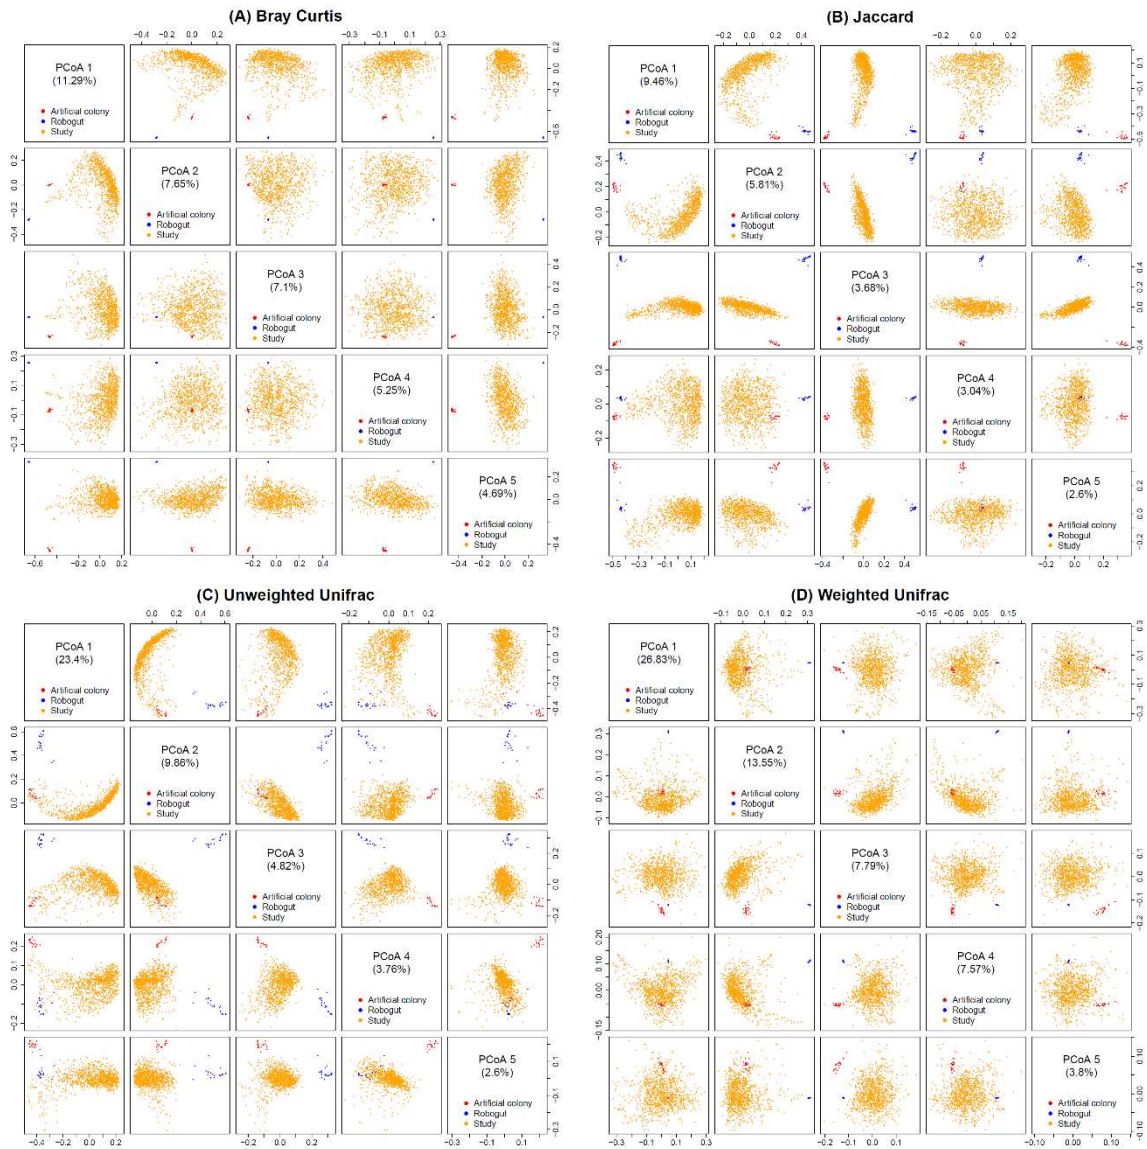

**Figure S2** Principal coordinate analysis (PCoA) of the first five principal components of artificial community (red), robogut (blue), and oral samples (orange), based on Bray Curtis (A), Jaccard (B), and Unweighted UniFrac (C) and Weighted UniFrac distances (D).

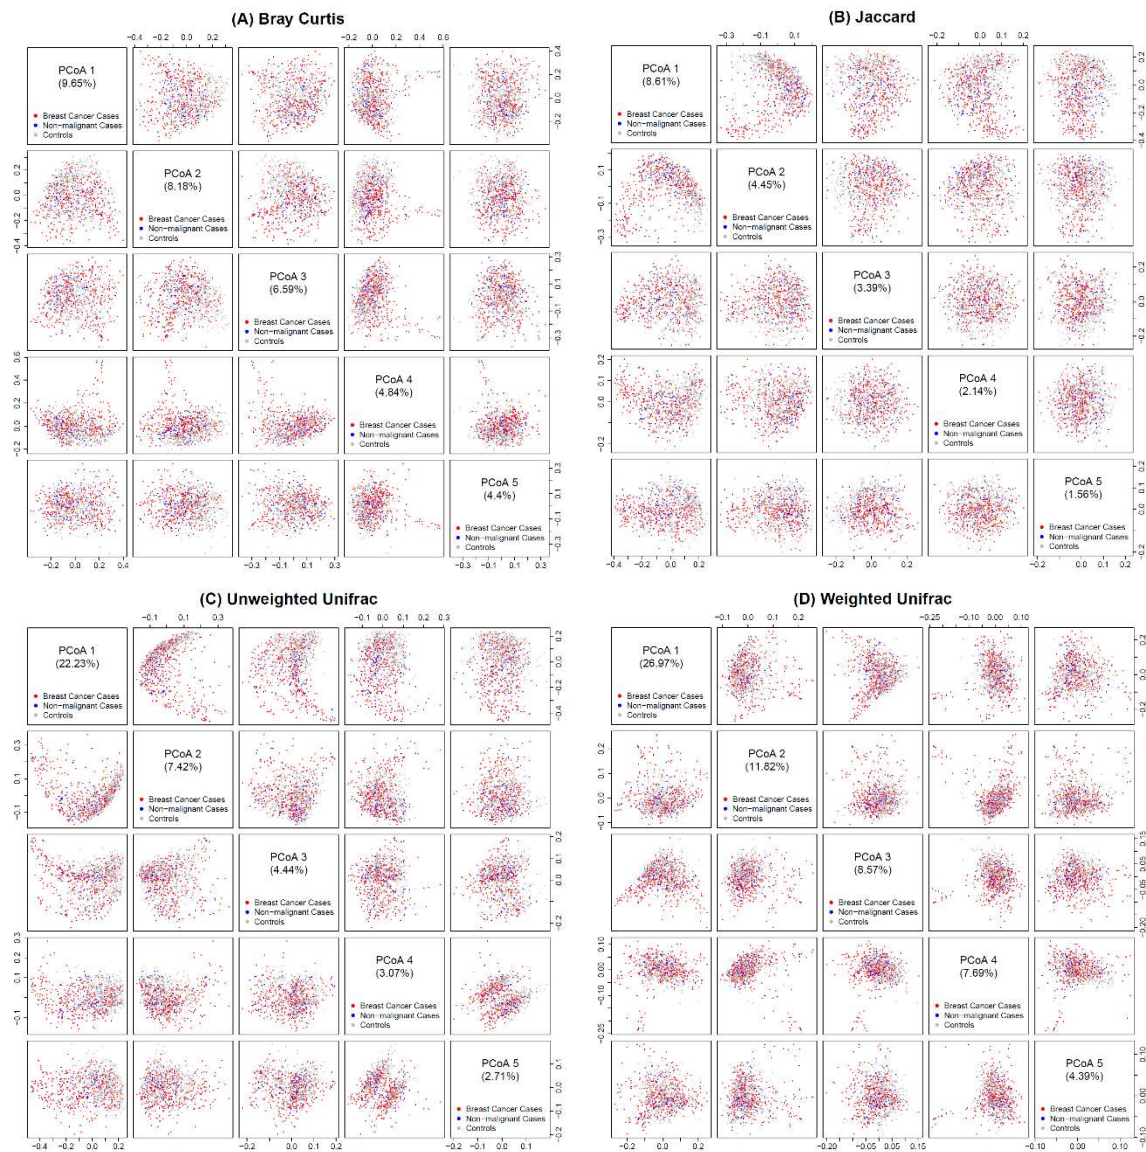

**Figure S3** Principal coordinate analysis (PCoA) of the first five principal components of breast cancer (red), non-malignant breast disease (blue), and controls (grey), based on Bray Curtis (A), Jaccard (B), and Unweighted UniFrac (C) and Weighted UniFrac distances (D).



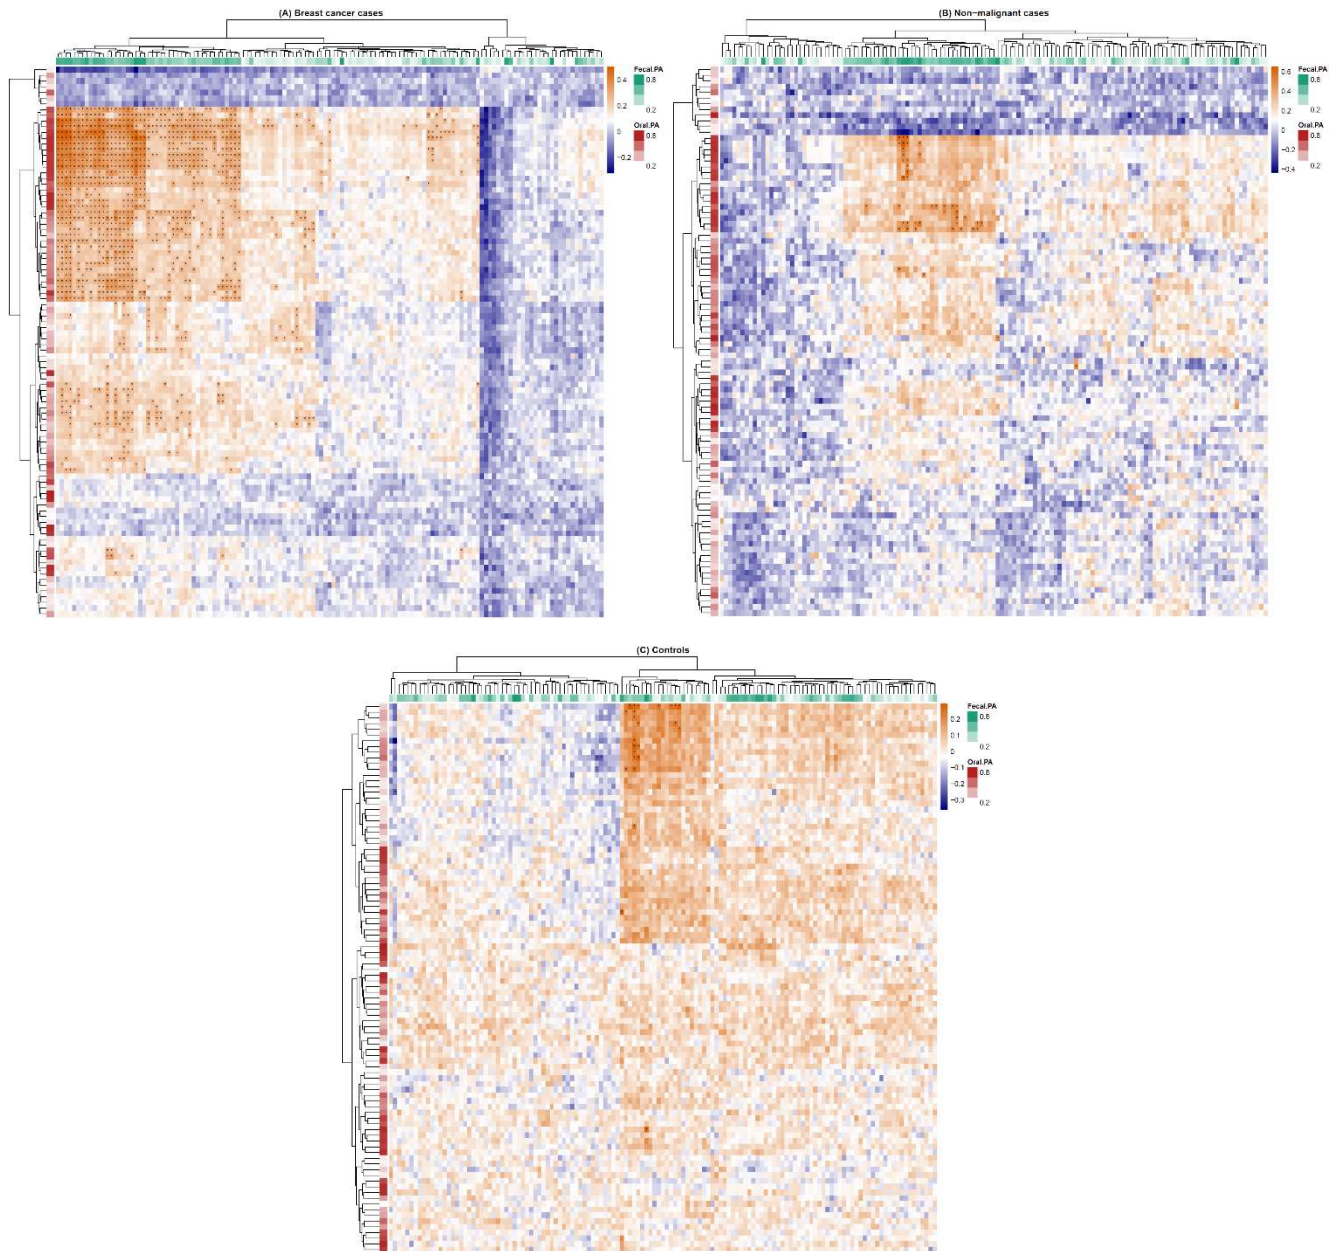

**Figure S4** Genus-level presence correlations between the oral and fecal microbiome within breast cancer cases (A), non-malignant cases (B), and controls (C). Taxa were present in at least 10% of each group. Color of the cells (orange to blue) indicates the scale of correlation coefficients, and the star (\*) in the cell indicates that the corresponding p-value was below the Bonferroni adjusted threshold  $p < 0.05/(133 \times 96) = 23.9E-06$ . Fecal.PA, presence of fecal taxa, Oral.PA, presence of oral taxa.
